# Supplementary material
Source: PubMed Central journal article supplement (PMC6380360)
Supplement: NIHMS1510697-supplement-Supplemental_Material.pdf [file NIHMS1510697-supplement-Supplemental_Material.pdf]

## **Additional Statistical Analyses for Supplement**

We performed a supplemental analysis using 3 EF categories of  $EF \leq 35\%$ ,  $EF > 35$  and  $< 50\%$ , and  $EF \geq 50\%$ . Categorical variables were analyzed as frequencies (percentages) using the Chi-Square test. Continuous variables were compared by one-way analysis of variance and presented as mean  $\pm$  standard deviation if normality assumptions appeared to be reasonable. BNP and nt-ProBNP were log-transformed before analysis. Highly skewed continuous variables were analyzed using non-parametric Kruskal Wallis tests in unadjusted analyses. Negative binomial regression was used for count data (e.g., hospitalizations). Similar to original analysis, we used ANCOVA to control for potential confounders that may affect physical function and QoL, including sex, BMI, non-white race, and comorbidities. GDS score was not adjusted for comorbidities given collinearity between GDS and clinical depression. Rank transformed ANCOVA was used for group comparisons for highly skewed continuous variables. Similarly, binary variables were adjusted using logistic regression for sex, BMI, non-white race, and comorbidities. In case of significant omnibus test, we conducted Tukey comparisons between  $EF \leq 35\%$  and  $EF \geq 50\%$  categories, as this comparison was the key interest of this study. Two tailed p value  $< 0.05$  was considered significant. All analyses were performed using SAS Enterprise Guide 7.1 (Cary, NC).

**Supplemental Table 1: Baseline Characteristics, Comorbidities, and Medications Among ADHF patients by EF Group**

| Characteristics                                                     | EF ≤ 35%<br>(n=86) | EF > 35% and <<br>50%<br>(n=28) | EF ≥ 50%<br>(n=88) | P-value |
|---------------------------------------------------------------------|--------------------|---------------------------------|--------------------|---------|
| Age (years)                                                         | 71.6 ± 7.5         | 73.3 ± 8.2                      | 72.0 ± 7.4         | 0.58    |
| Women                                                               | 38 (44%)           | 15 (54%)                        | 56 (64%)           | 0.036   |
| White                                                               | 36 (42%)           | 8 (29%)                         | 53 (60%)           | 0.005   |
| Black or African American                                           | 49 (57%)           | 18 (64%)                        | 33 (38%)           | 0.009   |
| Hispanic or Latino ethnicity                                        | 2 (2%)             | 0 (0%)                          | 1 (1%)             | 0.63    |
| Less than high school education                                     | 20 (24%)           | 7 (25%)                         | 10 (11%)           | 0.013   |
| Body Mass Index (kg/m <sup>2</sup> )                                | 30.5 ± 7.4         | 31.4 ± 7.9                      | 36.5 ± 9.4*        | <0.001  |
| <b>New York Heart Association Class</b>                             |                    |                                 |                    |         |
| - II                                                                | 15 (17%)           | 5 (18%)                         | 12 (14%)           | 0.84    |
| - III                                                               | 47 (55%)           | 13 (46%)                        | 45 (51%)           |         |
| - IV                                                                | 16 (19%)           | 7 (25%)                         | 22 (25%)           |         |
| Ejection Fraction (%), median (IQR)                                 | 25 (20, 30)        | 40 (40, 43)                     | 55 (55, 62)        | <0.001  |
| Days from initial presentation to baseline assessment, median (IQR) | 3.25 (2-4.5)       | 2.25 (1.5-3)                    | 2.5 (2-4)          | 0.030   |
| Patients with previous hospitalizations within 6 months             | 35 (41%)           | 16 (57%)                        | 38 (43%)           | 0.31    |
| Patients with previous HF hospitalizations within 6 months          | 27 (31%)           | 10 (36%)                        | 18 (20%)           | 0.15    |
| All-cause hospitalizations in last 6 months, total (mean ± SD)      | 60 (0.7 ± 1.0)     | 32 (1.1 ± 1.2)                  | 77 (0.9 ± 1.3)     | 0.26    |
| HF hospitalizations in last 6 months, total (mean ± SD)             | 41 (0.5 ± 0.8)     | 15 (0.5 ± 0.8)                  | 29 (0.3 ± 0.8)     | 0.36    |
| Non-HF hospitalizations in last 6 months, total (mean ± SD)         | 19 (0.2 ± 0.6)     | 17 (0.6 ± 0.9)                  | 48 (0.5 ± 0.9)     | 0.007   |
| B-type natriuretic peptide (pg/mL) (n=117)                          | 1452 ± 1172        | 862 ± 762                       | 529 ± 541*         | <0.001  |
| N-terminal brain natriuretic peptide (n=77)                         | 8630 ± 13403       | 4611 ± 4277                     | 2824 ± 3370*       | 0.002   |
| Live Alone                                                          | 29 (34%)           | 9 (32%)                         | 28 (32%)           | 0.96    |
| Current smoking                                                     | 10 (12%)           | 4 (14%)                         | 9 (10%)            | 0.84    |
| Alcohol Abuse                                                       | 6 (7%)             | 2 (7%)                          | 2 (2%)             | 0.30    |
| <b>Comorbidities</b>                                                |                    |                                 |                    |         |
| Diabetes mellitus                                                   | 43 (50%)           | 16 (57%)                        | 52 (59%)           | 0.47    |
| Hypertension                                                        | 77 (90%)           | 27 (96%)                        | 83 (94%)           | 0.34    |
| Hyperlipidemia                                                      | 60 (70%)           | 20 (71%)                        | 60 (68%)           | 0.94    |
| Atrial Fibrillation                                                 | 37 (43%)           | 12 (43%)                        | 44 (50%)           | 0.61    |
| Coronary artery disease (previous MI, PCI, or CABG)                 | 37 (43%)           | 8 (29%)                         | 28 (32%)           | 0.20    |
| Chronic obstructive pulmonary disease                               | 26 (30%)           | 6 (21%)                         | 33 (38%)           | 0.25    |
| Chronic kidney disease                                              | 28 (33%)           | 8 (29%)                         | 31 (35%)           | 0.80    |
| Stroke                                                              | 11 (13%)           | 4 (14%)                         | 17 (20%)           | 0.49    |
| Arthritis / Connective Tissue Disease                               | 32 (37%)           | 10 (35%)                        | 52 (60%)           | 0.007   |
| Cancer                                                              | 21 (24%)           | 4 (14%)                         | 17 (19%)           | 0.47    |
| Depression                                                          | 9 (10%)            | 7 (25%)                         | 17 (19%)           | 0.12    |
| Anemia (by Hgb)                                                     | 60 (70%)           | 23 (82%)                        | 61 (70%)           | 0.39    |
| Peripheral vascular disease                                         | 9 (10%)            | 4 (14%)                         | 13 (15%)           | 0.68    |
| Peptic ulcer disease                                                | 2 (2%)             | 2 (7%)                          | 5 (6%)             | 0.43    |
| Dementia                                                            | 1 (1%)             | 0 (0%)                          | 3 (3%)             | 0.41    |
| Obstructive sleep apnea                                             | 18 (21%)           | 5 (18%)                         | 38 (43%)           | 0.002   |
| AIDS/HIV                                                            | 2 (2%)             | 0 (0%)                          | 0 (0%)             | 0.26    |
| Total number of comorbidities                                       | 5.8 ± 1.8          | 5.9 ± 2.3                       | 6.5 ± 2.2          | 0.08    |
| <b>Current Medications</b>                                          |                    |                                 |                    |         |
| Loop diuretics                                                      | 81 (95%)           | 26 (93%)                        | 81 (93%)           | 0.95    |
| Beta Blockers                                                       | 78 (91%)           | 27 (97%)                        | 63 (72%)           | <0.001  |
| Angiotensin Converting Enzymes Inhibitors                           | 41 (48%)           | 15 (54%)                        | 28 (32%)           | 0.047   |
| Angiotensin receptor blockers                                       | 20 (23%)           | 4 (14%)                         | 20 (23%)           | 0.58    |
| Calcium channel blockers                                            | 12 (14%)           | 6 (21%)                         | 42 (48%)           | <0.001  |

Values presented as N (%) or mean  $\pm$  standard deviation unless otherwise indicated. Anemia was defined as Hgb <12g/dl for women or <13g/dl for men. *Abbreviations: HIV/AIDS – human immunodeficiency virus/acquired immunodeficiency syndrome, IQR – interquartile range.*

\*Indicates significantly different from EF $\leq$ 35% group.

**Supplemental Table 2: Unadjusted differences in physical function and quality of life amongst elderly ADHF patients by Heart Failure Phenotype**

|                                         | EF ≤ 35%<br>(n=86) | EF > 35%<br>and < 50%<br>(n=28) | EF ≥ 50%<br>(n=88) | P-value |
|-----------------------------------------|--------------------|---------------------------------|--------------------|---------|
| <b>SPPB Total Score</b>                 | 6.6 ± 2.5          | 6.0 ± 2.8                       | 5.5 ± 2.4*         | 0.015   |
| Balance Score                           | 2.9 ± 1.3          | 2.6 ± 1.3                       | 2.5 ± 1.3          | 0.17    |
| 4-meter Walk Score                      | 2.5 ± 0.9          | 2.4 ± 1.0                       | 2.0 ± 1.0*         | 0.002   |
| Chair Stand Score                       | 1.2 ± 1.1          | 1.1 ± 1.1                       | 1.0 ± 1.0          | 0.36    |
| 6 Minute Walk Distance (m)              | 205 ± 97           | 191 ± 87                        | 162 ± 102*         | 0.016   |
| Gait speed (m/s)                        | 0.65 ± 0.22        | 0.61 ± 0.23                     | 0.56 ± 0.21*       | 0.023   |
| Handgrip strength (kg)                  |                    |                                 |                    |         |
| Men                                     | 29.2               | 26.3                            | 26.3               | 0.34    |
| Women                                   | 18.6               | 19.1                            | 18.8               | 0.98    |
| <b>Frailty Phenotype</b>                |                    |                                 |                    |         |
| Frail (≥ 3 of 5 domains met)            | 44 (51%)           | 11 (39%)                        | 52 (59%)           | 0.17    |
| <b>Disease-Specific Quality of Life</b> |                    |                                 |                    |         |
| KCCQ Overall Score                      | 44 ± 20            | 47 ± 24                         | 36 ± 19*           | 0.005   |
| KCCQ Physical Limitation Score          | 53 ± 23            | 51 ± 26                         | 41 ± 22*           | 0.002   |
| <b>Non-Specific Quality of Life</b>     |                    |                                 |                    |         |
| Short Form-12 PCS                       | 29 ± 9             | 29 ± 10                         | 26 ± 8             | 0.08    |
| Short Form-12 MCS                       | 46 ± 14            | 46 ± 16                         | 41 ± 13            | 0.07    |
| <b>EQ-5D-5L Components</b>              |                    |                                 |                    |         |
| Walking                                 | 2.2 ± 1.0          | 2.5 ± 1.0                       | 2.8 ± 0.9*         | <0.001  |
| Self-Care                               | 1.5 ± 0.8          | 1.7 ± 0.9                       | 2.0 ± 1.0*         | 0.005   |
| Usual Activities                        | 2.5 ± 1.2          | 2.4 ± 1.1                       | 2.9 ± 0.9          | 0.06    |
| Pain/Discomfort                         | 2.4 ± 1.1          | 2.1 ± 0.8                       | 2.5 ± 1.2          | 0.37    |
| Depression/Anxiety                      | 1.7 ± 1.0          | 1.5 ± 0.7                       | 2.0 ± 1.0          | 0.049   |
| Visual Analog Scale (0-100)             | 59 ± 23            | 69 ± 17                         | 52 ± 23            | 0.002   |
| <b>Depression</b>                       |                    |                                 |                    |         |
| Geriatric Depression Scale Score        | 4.5 ± 3.4          | 4.3 ± 3.8                       | 5.4 ± 3.4          | 0.10    |
| Geriatric Depression Scale ≥5           | 38 (44%)           | 11 (39%)                        | 44 (50%)           | 0.55    |
| <b>Cognitive Function</b>               |                    |                                 |                    |         |
| MoCA Score                              | 20.6 ± 5.1         | 22.3 ± 4.4                      | 21.5 ± 4.1         | 0.48    |
| MoCA Score <26                          | 70 (81%)           | 21 (75%)                        | 67 (76%)           | 0.64    |

Values presented as N (%) or mean ± standard deviation. For KCCQ, SF-12 and Visual Analog Scale, higher score indicates better health status; for EQ-5D-5L components higher score indicates worse health status. *Abbreviations: KCCQ – Kansas City Cardiomyopathy Questionnaire, PCS – physical composite score, MCS – mental composite score, EQ-5D-5L – EuroQol, MoCA – Montreal Cognitive Assessment.*

\*Indicates significantly different from EF≤35% group

**Supplemental Table 3: Adjusted differences in physical function, quality of life and depression in elders hospitalized with ADHF by EF Group**

|                                         | EF ≤ 35%<br>(n=86) | EF > 35%<br>and < 50%<br>(n=28) | EF ≥ 50%<br>(n=88)     | P-value |
|-----------------------------------------|--------------------|---------------------------------|------------------------|---------|
| <b>Physical Function</b>                |                    |                                 |                        |         |
| SPPB Total Score                        | 6.4 ± 0.3          | 5.9 ± 0.5                       | 5.7 ± 0.3              | 0.16    |
| Balance Score                           | 2.8 ± 0.1          | 2.5 ± 0.2                       | 2.6 ± 0.1              | 0.41    |
| 4-meter Walk Score                      | 2.5 ± 0.1          | 2.3 ± 0.2                       | 2.1 ± 0.1 <sup>†</sup> | 0.042   |
| Chair Stand Score                       | 1.1 ± 0.1          | 1.0 ± 0.2                       | 1.0 ± 0.1              | 0.42    |
| 6 minute walk distance (m)              | 199 ± 10           | 191 ± 18                        | 168 ± 11               | 0.11    |
| Gait speed (m/s)                        | 0.64 ± 0.02        | 0.60 ± 0.04                     | 0.58 ± 0.02            | 0.21    |
| Handgrip strength (kg)                  |                    |                                 |                        |         |
| Men                                     | 28.5 ± 1.4         | 25.5 ± 2.6                      | 27.6 ± 1.8             | 0.58    |
| Women                                   | 18.7 ± 1.2         | 18.4 ± 1.8                      | 18.9 ± 1.0             | 0.97    |
| <b>Frailty Phenotype</b>                |                    |                                 |                        |         |
| Frail (≥ 3 of 5 domains met)            | 55% (44-66%)       | 42% (24-61%)                    | 55% (43-66%)           | 0.46    |
| <b>Disease-Specific Quality of Life</b> |                    |                                 |                        |         |
| KCCQ Overall Score                      | 44 ± 2             | 46 ± 4                          | 36 ± 2 <sup>†</sup>    | 0.023   |
| KCCQ Physical Limitation Score          | 53 ± 3             | 51 ± 4                          | 41 ± 3 <sup>†</sup>    | 0.005   |
| <b>Non-Specific Quality of Life</b>     |                    |                                 |                        |         |
| Short Form-12 PCS                       | 29 ± 1             | 29 ± 2                          | 26 ± 1                 | 0.13    |
| Short Form-12 MCS                       | 46 ± 2             | 46 ± 3                          | 41 ± 2                 | 0.13    |
| <b>EQ-5D-5L Components</b>              |                    |                                 |                        |         |
| Walking                                 | 2.3 ± 0.1          | 2.5 ± 0.2                       | 2.7 ± 0.1 <sup>†</sup> | 0.005   |
| Self-Care                               | 1.5 ± 0.1          | 1.7 ± 0.2                       | 1.9 ± 0.1 <sup>†</sup> | 0.009   |
| Usual Activities                        | 2.5 ± 0.1          | 2.5 ± 0.2                       | 2.8 ± 0.1              | 0.26    |
| Pain/Discomfort                         | 2.4 ± 0.1          | 2.1 ± 0.2                       | 2.7 ± 0.1              | 0.27    |
| Depression/Anxiety                      | 1.8 ± 0.1          | 1.5 ± 0.2                       | 2.0 ± 0.1              | 0.12    |
| Visual Analog Scale (0-100)             | 58.5 ± 2.4         | 67.4 ± 4.2                      | 52.8 ± 2.4             | 0.012   |
| <b>Depression</b>                       |                    |                                 |                        |         |
| GDS Score*                              | 4.5 ± 0.4          | 4.4 ± 0.7                       | 5.3 ± 0.4              | 0.44    |
| Geriatric Depression Scale ≥5*          | 46% (35-57%)       | 42% (25-61%)                    | 47% (36-58%)           | 0.90    |
| <b>Cognitive Function</b>               |                    |                                 |                        |         |
| MoCA Score                              | 21.3 ± 0.5         | 22.6 ± 0.8                      | 21.9 ± 0.5             | 0.38    |
| MoCA Score <26                          | 81% (71-89%)       | 72% (52-86%)                    | 79% (69-87%)           | 0.62    |

Values shown as mean ± standard error or percent (95% CI), adjusted for sex, race, BMI and total number of comorbidities. For KCCQ, SF-12 and Visual Analog Scale, higher score indicates better health status; for EQ-5D components higher score indicates worse health status. *Abbreviations: KCCQ – Kansas City Cardiomyopathy Questionnaire, PCS – physical composite score, MCS – mental composite score, EQ-5D-5L – EuroQol, MoCA – Montreal Cognitive Assessment.*

\*Adjusted for sex, race and BMI only.

<sup>†</sup>Indicates significantly different from EF≤35% group.
